# Supplementary material for: Association between Workplace Bullying, Job Stress, and Professional Quality of Life in Nurses: A Systematic Review and Meta-Analysis
Source: MDPI journal article supplement (doi:10.3390/healthcare12060623), 2024-03-09
Supplement: s1 [file s1]

**Supplementary Table S2.** Quality of studies included in the systematic review.

|                                                                             | (Yao et al., 2021) | (Kwak et al., 2020) | (Itzhaki et al., 2018) | (Magnavita, 2014) | (Jiao et al., 2023) | (Peng et al., 2022) | (Kim, Lee & Lee, 2019) | (Choi & Lee, 2017) | (Oh, Uhm & Yoon, 2016) |
|-----------------------------------------------------------------------------|--------------------|---------------------|------------------------|-------------------|---------------------|---------------------|------------------------|--------------------|------------------------|
| 1. Were the criteria for inclusion in the sample clearly defined?           | √                  | √                   |                        | √                 | √                   | √                   | √                      | √                  | √                      |
| 2. Were the study subjects and the setting described in detail?             | √                  | √                   | √                      | √                 | √                   | √                   |                        |                    | √                      |
| 3. Was the exposure measured in a valid and reliable way?                   | √                  | √                   | √                      | √                 | √                   | √                   | √                      | √                  | √                      |
| 4. Were objective, standard criteria used for measurement of the condition? | √                  | √                   | √                      | √                 | √                   | √                   | √                      | √                  | √                      |
| 5. Were confounding factors identified?                                     | √                  | √                   | √                      | √                 | NA                  | NA                  | √                      | √                  | NA                     |
| 6. Were strategies to deal with confounding factors stated?                 | √                  | √                   | √                      | √                 | NA                  | NA                  | √                      | √                  | NA                     |
| 7. Were the outcomes measured in a valid and reliable way?                  | √                  | √                   | √                      | √                 | √                   | √                   | √                      | √                  | √                      |
| 8. Was appropriate statistical analysis used?                               | √                  | √                   | √                      | √                 | √                   | √                   | √                      | √                  | √                      |
| <b>Total quality</b>                                                        | Good               | Good                | Good                   | Good              | Good                | Good                | Good                   | Good               | Good                   |

NA: not applicable

## References

- Choi, S.-H. & Lee, H. (2017) Workplace violence against nurses in Korea and its impact on professional quality of life and turnover intention. *Journal of Nursing Management*. 25 (7), 508–518. doi:10.1111/jonm.12488.
- Itzhaki, M., Bluvstein, I., Peles Bortz, A., Kostistky, H., Bar Noy, D., Filshtinsky, V. & Theilla, M. (2018) Mental Health Nurse's Exposure to Workplace Violence Leads to Job Stress, Which Leads to Reduced Professional Quality of Life. *Frontiers in Psychiatry*. 9, 59. doi:10.3389/fpsyt.2018.00059.
- Jiao, R., Li, J., Cheng, N., Liu, X. & Tan, Y. (2023) The mediating role of coping styles between nurses' workplace bullying and professional quality of life. *BMC Nursing*. 22 (1), 459. doi:10.1186/s12912-023-01624-y.
- Kim, Y., Lee, E. & Lee, H. (2019) Association between workplace bullying and burnout, professional quality of life, and turnover intention among clinical nurses. *PloS One*. 14 (12), e0226506. doi:10.1371/journal.pone.0226506.
- Kwak, Y., Han, Y., Song, J. & Kim, J. (2020) Impact of emotional labour and workplace violence on professional quality of life among clinical nurses. *International Journal of Nursing Practice*. 26 (1), e12792. doi:10.1111/ijn.12792.
- Magnavita, N. (2014) Workplace Violence and Occupational Stress in Healthcare Workers: A Chicken-and-Egg Situation—Results of a 6-Year Follow-up Study. *Journal of Nursing Scholarship*. 46 (5), 366–376. doi:10.1111/jnu.12088.
- Oh, H., Uhm, D. & Yoon, Y.J. (2016) Workplace Bullying, Job Stress, Intent to Leave, and Nurses' Perceptions of Patient Safety in South Korean Hospitals. *Nursing Research*. 65 (5), 380–388. doi:10.1097/NNR.0000000000000175.

Peng, J., Luo, H., Ma, Q., Zhong, Y., Yang, X., Huang, Y., Sun, X., Wang, X., He, J. & Song, Y. (2022) Association between workplace bullying and nurses' professional quality of life: The mediating role of resilience. *Journal of Nursing Management*. 30 (6), 1549–1558. doi:10.1111/jonm.13471.

Yao, X., Shao, J., Wang, L., Zhang, J., Zhang, C. & Lin, Y. (2021) Does workplace violence, empathy, and communication influence occupational stress among mental health nurses? *International Journal of Mental Health Nursing*. 30 (1), 177–188. doi:10.1111/inm.12770.
